# Supplementary material for: Assessment of Use and Safety of Edaravone for Amyotrophic Lateral Sclerosis in the Veterans Affairs Health Care System
Source: PubMed Central journal article supplement (PMC7536587; doi:10.1001/jamanetworkopen.2020.14645), 2020-10-05
Supplement: jamanetwopen-e2014645-s001.pdf [file jamanetwopen-e2014645-s001.pdf]

## Supplemental Online Content

Vu M, Tortorice K, Zacher J, et al. Assessment of use and safety of edaravone for amyotrophic lateral sclerosis in the Veterans Affairs Health Care System. *JAMA Netw Open*. 2020;3(10):e2014645. doi:10.1001/jamanetworkopen.2020.14645

**eFigure.** Flowchart of Descriptive Assessment, Matched Cohort Design, and Chronic User Sub-Analysis

**eTable 1.** Riluzole Use Patterns Among Edaravone Patients

**eTable 2.** Riluzole Use Continuation Among Patients With Riluzole Use Prior to Edaravone Initiation

**eTable 3.** Comprehensive Safety and Effectiveness Evaluation-Matched Edaravone and Riluzole-Only Users

This supplemental material has been provided by the authors to give readers additional information about their work.

**eFigure. Flowchart of descriptive assessment, matched cohort design, and chronic user sub-analysis**

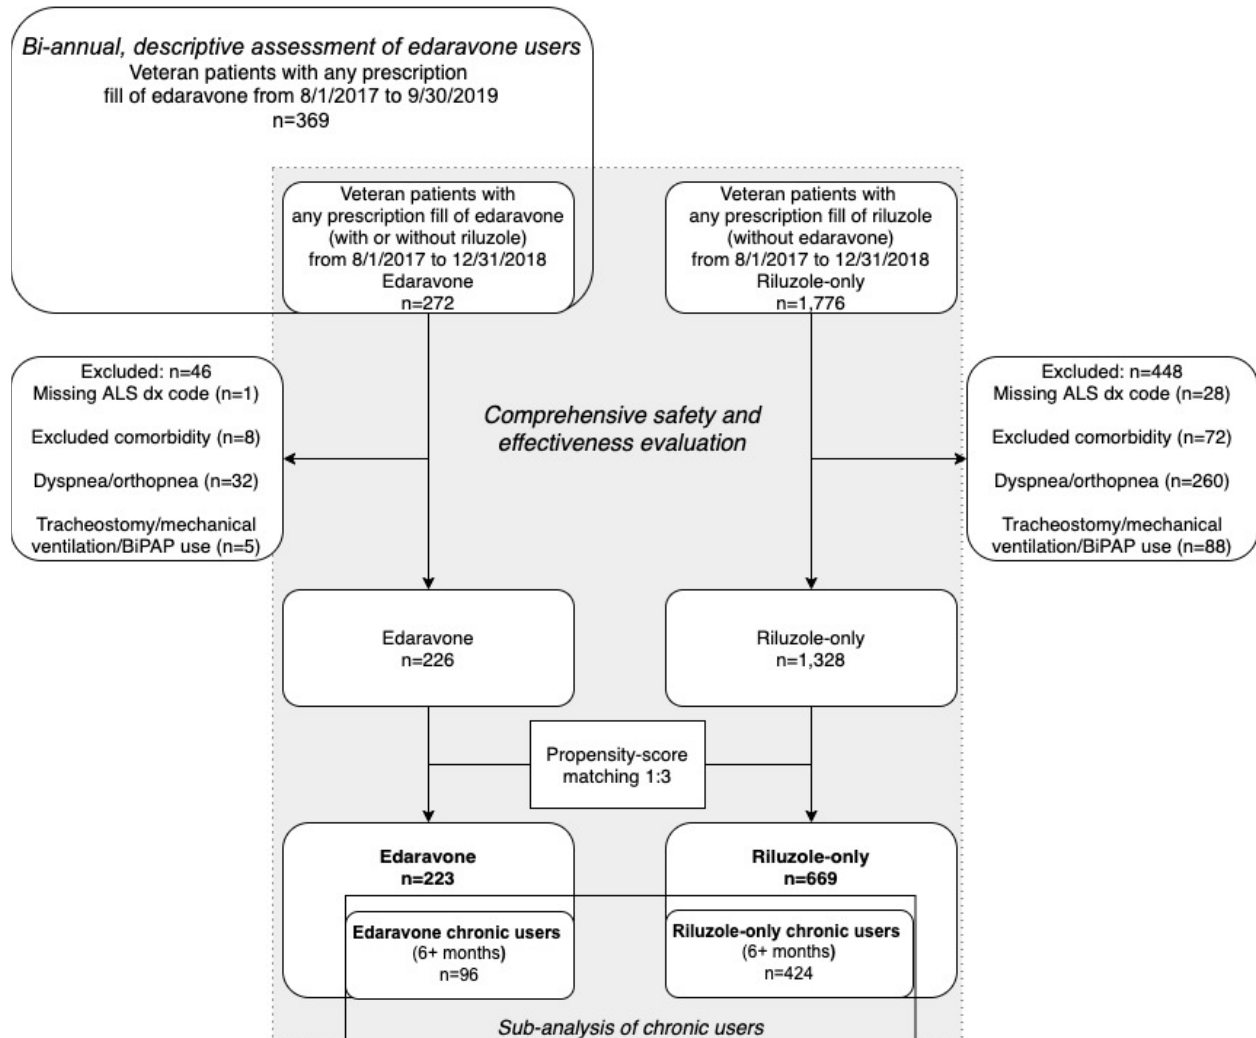

ALS dx: Amyotrophic lateral sclerosis diagnosis code; Excluded comorbidity: Parkinson's disease, dementia, or schizophrenia; BiPAP: bilevel positive airway pressure

**eTable 1. Riluzole use patterns among edaravone patients**

|                                                           | Riluzole use <sup>a</sup>                  |                                                                          |                                                |
|-----------------------------------------------------------|--------------------------------------------|--------------------------------------------------------------------------|------------------------------------------------|
|                                                           | Prior to edaravone initiation <sup>b</sup> | During edaravone treatment period (edaravone with riluzole) <sup>b</sup> | After edaravone discontinuation <sup>b,c</sup> |
|                                                           | n, row %                                   | n, row %                                                                 | n, row %                                       |
| <b>All edaravone users</b> N=369                          | 255 (69.1%)                                | 263 (71.3%)                                                              | 134 (36.3%)                                    |
| <b>Edaravone matched cohort</b> N=223                     | 157 (70.4%)                                | 162 (72.6%)                                                              | 94 (42.2%)                                     |
| <b>Edaravone chronic user sub-cohort<sup>d</sup></b> N=96 | 64 (66.7%)                                 | 68 (70.8%)                                                               | 34 (35.4%)                                     |

<sup>a</sup> defined as receiving ≥1 riluzole prescription fill during time periods specified, using prescription data from 8/1/2017 to 9/30/2019

<sup>b</sup> time periods are not mutually exclusive (e.g., not all edaravone with riluzole patients had use prior to edaravone initiation)

<sup>c</sup> no further treatment cycles were recorded within 60 days of the last dose and before the end of the evaluation period

<sup>d</sup> receiving ≥6 months of edaravone treatment

**eTable 2: Riluzole use continuation among patients with riluzole use prior to edaravone initiation**

|                                                           | Patients with riluzole use prior to edaravone initiation <sup>a</sup><br>n= | Riluzole use after edaravone initiation? <sup>a</sup> |                                     |
|-----------------------------------------------------------|-----------------------------------------------------------------------------|-------------------------------------------------------|-------------------------------------|
|                                                           |                                                                             | Yes (row % of those with prior use):                  | No (row % of those with prior use): |
| <b>All edaravone users</b> N=369                          | 255                                                                         | 236 (92.5%)                                           | 19 (7.5%)                           |
| <b>Edaravone matched cohort</b> N=223                     | 157                                                                         | 146 (93.0%)                                           | 11 (7.0%)                           |
| <b>Edaravone chronic user sub-cohort<sup>b</sup></b> N=96 | 64                                                                          | 59 (92.2%)                                            | 5 (7.8%)                            |

<sup>a</sup> defined as receiving ≥1 riluzole prescription fill during time periods specified, using prescription data from 8/1/2017 to 9/30/2019.

<sup>b</sup> receiving ≥6 months of edaravone treatment

**eTable 3: Comprehensive safety and effectiveness evaluation- matched edaravone and riluzole-only users**

| Baseline characteristics    | Before matching    |                          |      | After matching     |                        |      |
|-----------------------------|--------------------|--------------------------|------|--------------------|------------------------|------|
|                             | Edaravone<br>N=226 | Riluzole-only<br>N=1,328 | SMD  | Edaravone<br>N=223 | Riluzole-only<br>N=669 | SMD  |
|                             | n (%)              | n (%)                    |      | n (%)              | n (%)                  |      |
| Age ≥65 years               | 130 (57.5%)        | 923 (69.5%)              | 0.25 | 130 (58.3%)        | 389 (58.2%)            | 0    |
| Male                        | 216 (95.6%)        | 1294 (97.4%)             | 0.10 | 216 (96.9%)        | 649 (97.0%)            | 0.01 |
| Caucasian                   | 167 (73.9%)        | 964 (72.6%)              | 0.03 | 164 (73.5%)        | 489 (73.1%)            | 0.01 |
| Married                     | 172 (76.1%)        | 947 (71.3%)              | 0.11 | 169 (75.8%)        | 509 (76.1%)            | 0.01 |
| Priority service connection | 224 (99.1%)        | 1226 (92.3%)             | 0.34 | 221 (99.1%)        | 663 (99.1%)            | 0    |
| 50%-100%                    |                    |                          |      |                    |                        |      |
| No copay                    | 224 (99.1%)        | 1227 (92.4%)             | 0.34 | 221 (99.1%)        | 663 (99.1%)            | 0    |
| Duration of ALS             | n (% cat)          | n (% cat)                |      | n (% cat)          | n (% cat)              |      |
| ≤2 years                    | 154 (68.1%)        | 918 (69.1%)              | 0.02 | 153 (68.6%)        | 458 (68.5%)            | 0.01 |
| >2 years                    | 20 (8.9%)          | 124 (9.3%)               | 0.01 | 20 (9.0%)          | 62 (9.3%)              | 0    |
| Unknown                     | 52 (23.0%)         | 286 (21.5%)              | 0.04 | 50 (22.4%)         | 149 (22.3%)            | 0.01 |

SMD=Standardized mean difference
